# Supplementary material for: Intracellular and nuclear CXCR4 signaling promotes erythroblast enucleation
Source: Research Square preprint supplement (doi:10.21203/rs.3.rs-2869635/v1), 2023-05-23
Supplement: Supplementary file 1 [file 9cead23abc8a3b830adc721e.pdf]

## **Supplementary Video legends**

**Supplementary Video 1. CXCL12-induced intracellular calcium fluxes in leukocytes.** Live cell imaging of free intracellular calcium by Fluo-4 fluorescence (green) after CXCL12 stimulation of CD45<sup>+</sup> (red) leukocytes. The video corresponds to the Extended Data Fig. 1i.

**Supplementary Video 2. High baseline free calcium and no CXCL12-induced rapid free calcium changes in erythroblasts.** Live cell imaging of free intracellular calcium after CXCL12 stimulation by Fluo-4 fluorescence (green) in ACKR1<sup>+</sup> (red) nucleated erythroid cells. The video corresponds to Extended Data Fig. 1i.

**Supplementary Video 3. Erythroblast endocytosis of CXCL12 and CXCR4.** A 3D confocal microscopy image of a freshly isolated viable erythroblast pre-stained with anti-CXCR4 (green) and anti-Ter119 (blue) followed by stimulation with CXCL12-AF647 (red). Image was taken 60 min after the addition of CXCL12. The video corresponds to Fig. 1f.

**Supplementary Video 4. Nuclear localization of CXCR4 and phosphorylated CXCR4 in an erythroblast.** A 3D confocal microscopy image of a freshly isolated viable erythroblast stimulated with CXCL12 and stained with anti-CXCR4 (green), anti-pS346 CXCR4 (red), anti-Ter119 (blue) and Hoechst (white). Scale bar, 5  $\mu$ m. The video corresponds to Fig. 2a.

**Supplementary Video 5. CXCL12 triggers erythroblast elongation, CXCR4 redistribution, nuclear polarization and chromatin condensation.** Live cell imaging of freshly isolated viable erythroblasts pre-labelled with anti-CXCR4 antibody (green), anti-Ter119 antibody (blue) and nuclear dye Hoechst (white) and stimulated with CXCL12-AF647 (red), added during live imaging. The video corresponds to Extended Data Fig. 4a.

**Supplementary Video 6. CXCL12-triggered erythroblast elongation, nuclear polarization, chromatin condensation and rapid perinuclear Ca<sup>2+</sup> transients.** Live cell imaging of freshly isolated viable erythroblasts pre-labelled with Ca<sup>2+</sup> sensitive dye Fluo-4 (green), anti-CD71 antibody (white) and nuclear dye Hoechst (blue) and stimulated with CXCL12-AF647 (red), added during live imaging. The video corresponds to Fig. 3a.
