# Supplementary material for: Intracellular and nuclear CXCR4 signaling promotes erythroblast enucleation
Source: Research Square preprint supplement (doi:10.21203/rs.3.rs-2869635/v1), 2023-05-23
Supplement: Supplementary file 1 [file caba6b9bd1b236d84b6b24c3.xlsx]

## Sheet: Supplementary Table 1
UKA_STK_02_0min CXCR4KO vs WT
Kinase Uniprot ID	Kinase Name	Kinase Group	Kinase Family	Mean Specificity Score	Mean Significance Score	Mean Final Score	Median Final score	Mean Kinase Statistic	Median Kinase Statistic	SD Kinase Statitistic
P17612	PKA[alpha]	AGC	PKA	2.69897000433602	1.20255852795818	3.9015285322942	3.87942606879415	-0.475653371331965	-0.484412653299314	0.0134467394842144
Q13976	PKG1	AGC	PKG	2.69897000433602	1.15043748163944	3.84940748597546	3.87942606879415	-0.515893147734452	-0.513454199690764	0.037058939009793
P51817	PRKX	AGC	PKA	2.18156188812659	1.20430517781821	3.3858670659448	3.68193666503724	-0.496880681119276	-0.494679390102111	0.0463945947110172
Q13237	PKG2	AGC	PKG	2.29502736580103	1.14891718821491	3.44394455401593	3.47366072261016	-0.487794137443206	-0.481745241736729	0.030987502467116
O15111	IKK[alpha]	Other	IKK	1.74077078935249	1.55159588617417	3.29236667552666	3.36451625318509	-0.825646102029761	-0.842552613713016	0.0253597675248835
Q13131	AMPK[alpha]1	CAMK	CAMKL	1.67189109726621	1.45312502761575	3.12501612488195	3.16494389827988	-0.611928290282696	-0.581774902259109	0.0376805933178357
Q6ZWH5	Nek10	Other	NEK	0.575314865608191	2.46040937697619	3.03572424258438	3.03572424258438	-0.496729490041365	-0.496729490041365	0
Q9UBS0	p70S6K[beta]	AGC	RSK	1.68108493175431	0.993533229982261	2.67461816173658	2.49757288001557	-0.520360130407936	-0.475645772814359	0.0942241043445863
P31751	Akt2/PKB[beta]	AGC	AKT	1.15678910427042	1.34581039060351	2.50259949487394	2.47366072261016	-0.431895351161335	-0.429237491318629	0.0389407503347901
P31749	Akt1/PKB[alpha]	AGC	AKT	1.22193949525946	1.31143361621352	2.53337311147298	2.41566877563247	-0.436366993808804	-0.439969207267754	0.0345719452149887
O14920	IKK[beta]	Other	IKK	0.914808403580567	1.01153252959876	1.92634093317932	2.12609840213554	-0.593208517576071	-0.646963254679962	0.0852401214036965
P11309	Pim1	CAMK	PIM	0.927130436195948	1.01050385565712	1.93763429185307	1.93854752091281	-0.354650718451111	-0.350513743207158	0.00571097862569585
Q96Q40	PFTAIRE2	CMGC	CDK	0.644288326226892	1.02571451525521	1.6700028414821	1.77989191195995	-0.496494072302	-0.538917319318017	0.0645246684382694
O43930	PRKY	AGC	PKA	0.5693137209199	1.06761103777385	1.63692475869375	1.70421305974839	-0.421523428518855	-0.421301560373124	0.0730607020172603
Q9P1W9	Pim2	CAMK	PIM	0.466342498783863	0.980535739509945	1.44687823829381	1.59284713032936	-0.327389914317755	-0.342454765574796	0.0348951956117591
P51812	RSK2	AGC	RSK	0.543185284483644	0.934009465545683	1.47719475002933	1.49675422853489	-0.408458969901344	-0.408458969901344	0
Q15418	RSK3	AGC	RSK	0.529371413788425	0.883797425260493	1.41316883904892	1.43226803745193	-0.395212159731743	-0.395212159731743	0
Q86V86	Pim3	CAMK	PIM	0.562383225775162	0.957741807783443	1.5201250335586	1.43114146228868	-0.332759944729136	-0.333044817579547	0.0111431859620467
Q05655	PKC[delta]	AGC	PKC	0.310126063378287	1.08065642203688	1.39078248541516	1.4020416850256	-0.313173495475053	-0.307135154075071	0.01705544628606
Q9HBY8	SGK2	AGC	SGK	0.418713742289532	0.821450582263186	1.24016432455272	1.39776632561357	-0.319338161265082	-0.35593399882589	0.0706317197412229
P17252	PKC[alpha]	AGC	PKC	0.405157279062825	0.952991986853173	1.358149265916	1.34949820512163	-0.332321069019832	-0.338770439735019	0.00843435682586009
Q15131	CDK10	CMGC	CDK	0.31268207024486	1.17582648161323	1.48850855185809	1.34563090902471	-0.314974388642821	-0.322088253940189	0.0496848513010974
Q13535	ATR	Atypical	PIKK	0.30032583966177	0.94928186531521	1.24960770497698	1.31158017799729	-0.303749489582456	-0.316646734007628	0.0386917332755173
Q00534	CDK6	CMGC	CDK	0.388664444261239	0.904161182285152	1.29282562654639	1.27310985925818	-0.357157360158779	-0.356741989327359	0.00124611249425917
O75116	ROCK2	AGC	DMPK	0.486569957580263	0.826538247454542	1.3131082050348	1.26529615769896	-0.402239414913695	-0.409563154589972	0.0990449520507155
O00141	SGK1	AGC	SGK	0.449944325016626	0.822125571634672	1.2720698966513	1.26510420433367	-0.421985623625675	-0.421985623625675	0
O75582	MSK1	AGC	RSK	0.432023769851857	0.819048898034131	1.25107266788599	1.25589486051429	-0.373573836700999	-0.373573836700999	0
Q14164	IKK[epsilon]	Other	IKK	0.568651266181426	0.812148565131252	1.38079983131268	1.18863951351233	-0.436764257284724	-0.38282877212338	0.120312762781683
Q16566	CaMK4	CAMK	CAMK1	0.464710649025022	0.70034261507643	1.16505326410145	1.17882722836587	-0.371004417626016	-0.354345883367947	0.046107266736541
Q15349	RSK1/p90RSK	AGC	RSK	0.399169531024662	0.688406058487762	1.08757558951242	1.09474395125155	-0.370891397345205	-0.370891397345205	0
P42345	mTOR/FRAP	Atypical	PIKK	0.399565402243358	0.784299034295037	1.1838644365384	0.996057186350755	-0.352351138986943	-0.344788170496268	0.0679637302707075
Q9UIK4	DAPK2	CAMK	DAPK	0.182451105163967	0.67010841096641	0.852559516130376	0.955506555556207	-0.218122952058007	-0.235463821566887	0.0321090510777072
O15075	DCAMKL1	CAMK	DCAMKL	0.400469486361569	0.52454242325803	0.9250119096196	0.898217193728847	-0.391141994815152	-0.391141994815152	0.119021085401977
O96017	CHK2	CAMK	RAD53	0.341755982565245	0.598175989112574	0.939931971677819	0.89319737240035	-0.305160423693238	-0.314020069686549	0.0706380307145404
P24723	PKC[eta]	AGC	PKC	0.0728681198975988	0.566492045166016	0.639360165063615	0.83360541272076	-0.154134689310031	-0.21134751622275	0.101178733927696
P48729	CK1[alpha]	CK1	CK1	0.164241451153173	0.482383009112174	0.646624460265347	0.768163555135085	-0.217526916416821	-0.262365609372238	0.0802773265617088
P23443	p70S6K	AGC	RSK	0.187196345040232	0.62903503138694	0.816231376427172	0.7661513763298	-0.265731873115795	-0.264621626545846	0.0367729105711723
Q04759	PKC[theta]	AGC	PKC	0.0898905512825911	0.655347570607922	0.745238121890514	0.734880164125787	-0.224071841775898	-0.225261931350732	0.0160048535979512
Q02156	PKC[epsilon]	AGC	PKC	0.0759931700966614	0.572911325294672	0.648904495391334	0.732058961000364	-0.194967376675778	-0.215639719388622	0.0612465315231697
P49137	MAPKAPK2	CAMK	MAPKAPK	0.215506067041072	0.552516094639382	0.768022161680453	0.730720610228101	-0.284302086406897	-0.27714843649848	0.0366043978296309
Q96GD4	AurB/Aur1	Other	AUR	0.207624402763092	0.370590979620859	0.578215382383951	0.686099049330499	-0.239478457694975	-0.270606779365674	0.0617683484036183
Q8IWB6	SgK307	Other	NKF5	0.362463303494459	0.499220587950009	0.861683891444469	0.678940370793319	0.352020239672978	0.258423240220458	0.128162969787359
Q16644	MAPKAPK3	CAMK	MAPKAPK	0.148022830160247	0.548701018007446	0.696723848167692	0.664847115223651	-0.259432266813269	-0.2711403596799	0.0452317395052863
O95819	HGK/ZC1	STE	STE20	0.260932136029912	0.466874765957653	0.727806901987565	0.661561973523834	-0.284898132196421	-0.273570667522056	0.0754139944247427
Q00532	CDKL1	CMGC	CDKL	0.205647466293299	0.450543369581444	0.656190835874743	0.646938202441164	-0.243862185765557	-0.264036121759196	0.0473682481793265
O76039	CDKL5	CMGC	CDKL	0.240605228779029	0.351714986217518	0.592320214996547	0.635464012922005	-0.262376485142789	-0.272313775831492	0.0819739715159341
O14965	AurA/Aur2	Other	AUR	0.230514233009678	0.406346003895868	0.636860236905545	0.633196151466183	-0.264615395761495	-0.264615395761495	0
P49841	GSK3[beta]	CMGC	GSK	0.1501457161977	0.470787543815756	0.620933260013456	0.621050042032576	-0.184189845098427	-0.184189845098427	0
Q13464	ROCK1	AGC	DMPK	0.167663575559226	0.186424611903995	0.354088187463222	0.568019011389062	0.169545478837499	0.286512727891037	0.160164001989869
Q13153	PAK1	STE	STE20	0.190325110225457	0.357081452529284	0.54740656275474	0.548397756667021	-0.236579615817657	-0.236579615817657	0
Q15139	PKD1	CAMK	PKD	0.166117929391909	0.386368913883448	0.552486843275357	0.545039343568486	-0.213560655912746	-0.213560655912746	0
P05771	PKC[beta]	AGC	PKC	0.0798458432561816	0.467026627805082	0.546872471061263	0.543767616504849	-0.170691135506341	-0.170691135506341	0
P04049	RAF1	TKL	RAF	0.169109995732797	0.339489671918572	0.508599667651369	0.493549088659676	-0.219682791597815	-0.215527682268956	0.0124653279865761
P05129	PKC[gamma]	AGC	PKC	0.0672458422883623	0.453574770407728	0.52082061269609	0.469605617530397	-0.169922823447511	-0.154585173715538	0.0442775325626012
Q00526	CDK3	CMGC	CDK	0.0734170276315838	0.273153459279326	0.34657048691091	0.449756966816166	-0.135012541906012	-0.178830043827927	0.0580044634921664
Q9BWU1	CDK11	CMGC	CDK	0.134219966815435	0.291707931615991	0.425927898431426	0.428892377575954	-0.163842805887251	-0.163842805887251	0
Q15759	p38[beta]	CMGC	MAPK	0.14018155881072	0.285399231875226	0.425580790685946	0.386275883279142	-0.176283164084007	-0.166682491037322	0.0952444722558342
P50613	CDK7	CMGC	CDK	0.0745155471287531	0.300638785126521	0.375154332255274	0.35995605922491	-0.15371936209037	-0.159150011005228	0.0463953575064942
P16066	ANP[alpha]	RGC	RGC	0.0339232799617343	0.330989178017172	0.364912457978906	0.353910098725572	-0.158778405004195	-0.159644921724103	0.029358928999486
Q8NI60	ADCK3	Atypical	ABC1	0.13682758180357	0.443295622283182	0.580123204086752	0.34819494833912	-0.195024167894191	-0.151317606533128	0.101699246387443
P41743	PKC[iota]	AGC	PKC	0.0321504191372109	0.300065831958509	0.33221625109572	0.314996741796167	-0.127150170575656	-0.115165412441675	0.0357683719539639
Q13164	ERK5	CMGC	MAPK	0.058512286339062	0.183508999137823	0.242021285476885	0.269405044130005	-0.128108137808091	-0.135181749665977	0.0403728081177496
Q05513	PKC[zeta]	AGC	PKC	0.0367307044739952	0.201914199029094	0.238644903503089	0.258016865645037	-0.0939160597042312	-0.0994408624048793	0.0109629404914598
O15264	p38[delta]	CMGC	MAPK	0.045330970251873	0.236056213286128	0.281387183538001	0.249710736147018	-0.130971632188787	-0.125052583911117	0.0353284600643676
P28482	ERK2	CMGC	MAPK	0.0547291909594695	0.233496957715833	0.288226148675303	0.235077015350112	-0.127128509990888	-0.109705228619494	0.0532215988881003
P27361	ERK1	CMGC	MAPK	0.0405345290381824	0.225258054299005	0.265792583337187	0.233028284119103	-0.107708974491906	-0.11618324337143	0.0724049506254121
Q16539	MAPK14	CMGC	MAPK	0.0452446653881141	0.161522635817447	0.206767301205561	0.218931425184802	-0.108357978377759	-0.117760861637241	0.0400271609552796
P10398	ARAF	TKL	RAF	0.0866954888476676	0.135068495944039	0.221763984791707	0.217447117603267	-0.11377023609738	-0.11377023609738	0
P15056	BRAF	TKL	RAF	0.0866954888476676	0.135068495944039	0.221763984791707	0.217447117603267	-0.11377023609738	-0.11377023609738	0
Q96S38	RSKL1	AGC	RSKL	0.0601880791287621	0.152812768144843	0.213000847273605	0.213593022173691	-0.0839855362210293	-0.0839855362210293	0
Q9Y6S9	RSKL2	AGC	RSKL	0.0842559229429933	0.120659209787645	0.204915132730638	0.203612537572818	0.111669503752798	0.111669503752798	0
P53778	p38[gamma]	CMGC	MAPK	0.0482871433615613	0.12599093156167	0.174278074923232	0.154366247054376	-0.0683977180523196	-0.0705713932932069	0.0805043239216703
P51955	Nek2	Other	NEK	0.0464842512873144	0.0969355872297504	0.143419838517065	0.145810595595027	0.0634158840590561	0.0634158840590561	0
Q16512	PKN1/PRK1	AGC	PKN	0.045739670619776	0.0780678164751208	0.123807487094897	0.134848628820366	0.0519046972670646	0.0764838450457028	0.0493489500789147
P11802	CDK4	CMGC	CDK	0.0429848979130129	0.118604644391141	0.161589542304154	0.132475945580397	-0.0668230887623584	-0.0560446657541332	0.0323352690246758
P50750	CDK9	CMGC	CDK	0.0400674918039443	0.0889642955653134	0.129031787369258	0.124670136167334	-0.0720540522728851	-0.069764247546434	0.00343470708967655
O14757	CHK1	CAMK	CAMKL	0.0525688188373916	0.101739099808607	0.154307918645998	0.12409182010148	-0.097689795619958	-0.09590962290834	0.0579333973591576
P53779	JNK3	CMGC	MAPK	0.00748354688290277	0.0803373473177713	0.0878208942006741	0.0764285700766518	-0.0646759083863634	-0.056147699340724	0.0275560044080894
P45983	JNK1	CMGC	MAPK	0.00569991786575293	0.070830554269708	0.0765304721354609	0.0749458796881574	-0.0587508046611013	-0.056147699340724	0.0218649250367431
P06493	CDC2/CDK1	CMGC	CDK	0.00850417332025269	0.0594208311762144	0.0679250044964671	0.0596708200457157	-0.0308928589547056	-0.0369863535682307	0.0423002783690524
P45984	JNK2	CMGC	MAPK	0.0140292203065391	0.0720010049989502	0.0860302253054893	0.0480372365377037	-0.0661790879591286	-0.0524034570050111	0.0340145158031004
P24941	CDK2	CMGC	CDK	0.00638748955414165	0.0440243847338086	0.0504118742879502	0.047236607725637	-0.00636973115979198	-0.0153602168751238	0.0394976330259354
O43293	DAPK3	CAMK	DAPK	0.0195421077238999	0.0250280057019311	0.044570113425831	0.044570113425831	0.0281650053458909	0.0281650053458909	NA
O60285	NuaK1	CAMK	CAMKL	0.00966705920557934	0.0276034138716254	0.0372704730772047	0.0383475706427431	0.0147082369223846	0.0147082369223846	0
Q00535	CDK5	CMGC	CDK	0.00800175797273418	0.0220139419020622	0.0300156998747964	0.0309495706537934	0.0210762498514551	0.0210762498514551	0
Q92772	CDKL2	CMGC	CDKL	0.00966114521239857	0.0186344909214556	0.0282956361338542	0.0282956361338542	-0.0166501567796428	-0.0166501567796428	NA
Q00537	PCTAIRE2	CMGC	CDK	0.0150228735845067	0.00966114521239857	0.0246840187969052	0.0246840187969052	-0.0158245146852841	-0.0158245146852841	NA

## Sheet: Supplementary Table 2
UKA_STK_03_60min vs 10min WT
Kinase Uniprot ID	Kinase Name	Kinase Group	Kinase Family	Mean Specificity Score	Mean Significance Score	Mean Final Score	Median Final score	Mean Kinase Statistic	Median Kinase Statistic	SD Kinase Statitistic
O15111	IKK[alpha]	Other	IKK	2.52604750425076	1.48904709483346	4.01509459908423	4.19382002601611	1.01115512654719	0.97162989396092	0.0592878488794038
Q13237	PKG2	AGC	PKG	2.63207444974402	1.2095677911999	3.84164224094392	3.86646109162978	0.591035868936681	0.586583645533965	0.0205513459666387
Q9UBS0	p70S6K[beta]	AGC	RSK	2.64595653158939	1.22806646265839	3.87402299424778	3.85387196432176	0.700406684654608	0.676897633060092	0.0956222305541965
P17612	PKA[alpha]	AGC	PKA	2.69897000433602	1.13357213576886	3.83254214010488	3.84163750790475	0.546523499737706	0.554165652633191	0.0208092832905946
Q13976	PKG1	AGC	PKG	2.64595653158939	1.14568194284548	3.79163847443487	3.84163750790475	0.585423989860057	0.601522731528709	0.0408607309712547
P51817	PRKX	AGC	PKA	2.57162244481621	1.08639705348877	3.65801949830498	3.75448733218585	0.592466730113505	0.575569240428542	0.0444422841760763
O43930	PRKY	AGC	PKA	1.45579466884939	1.34251920847694	2.79831387732633	2.85636076472546	0.676883363772965	0.596341323640329	0.196176459554526
Q96Q40	PFTAIRE2	CMGC	CDK	1.02039532563625	1.4314204499339	2.45181577557015	2.46445272082333	0.671260080602467	0.702867180896195	0.0715675552820556
Q16566	CaMK4	CAMK	CAMK1	1.14545681353132	1.01161844389389	2.15707525742521	2.21154879297654	0.57207119201294	0.580992354930002	0.0821091589555787
Q13131	AMPK[alpha]1	CAMK	CAMKL	1.20580295671813	0.923314988030371	2.12911794474851	2.12842706445412	0.557841246026507	0.561761241104672	0.0141431477656563
Q15139	PKD1	CAMK	PKD	0.839094614900502	1.28135348446443	2.12044809936494	2.10790539730952	0.565998507535112	0.565998507535112	0
Q6ZWH5	Nek10	Other	NEK	0.580198135264582	1.52384599516894	2.10404413043352	2.10404413043352	0.521633769497867	0.521633769497867	0
Q9HBY8	SGK2	AGC	SGK	1.0324425126655	0.93832639368709	1.97076890635259	2.08301995267962	0.476886460991535	0.499746837380668	0.0646950770123706
Q86V86	Pim3	CAMK	PIM	0.908677768974988	1.01184599414893	1.92052376312392	1.91535223914527	0.377104864569016	0.382846522500696	0.0157843215391376
O14920	IKK[beta]	Other	IKK	0.875145270224963	1.05240026174704	1.927545531972	1.91506642506328	0.630095239828138	0.62526434424568	0.0204537271058567
P48729	CK1[alpha]	CK1	CK1	0.881315419517435	0.954146239618075	1.83546165913551	1.90378541465359	0.520819374321679	0.512440365370195	0.0393379133922725
Q13535	ATR	Atypical	PIKK	0.659857387591547	1.20179651396131	1.86165390155286	1.87667113307365	0.474920143447571	0.472929340715491	0.00597240819623996
O95819	HGK/ZC1	STE	STE20	0.741854703013033	1.06139411609957	1.8032488191126	1.77837789662465	0.561000827958072	0.571919131616998	0.128091322386492
Q15131	CDK10	CMGC	CDK	0.409244859883124	1.26272439461327	1.6719692544964	1.64635300358973	0.396951681301516	0.399981879252822	0.0296036664426447
P17252	PKC[alpha]	AGC	PKC	0.534304586964323	0.898426406199713	1.43273099316404	1.6086413975126	0.37288988226142	0.38431351453768	0.0242230610447841
P31749	Akt1/PKB[alpha]	AGC	AKT	0.694509430694726	0.900963820697641	1.59547325139237	1.53760200210104	0.400884195556207	0.396433630627722	0.0252083927700975
Q9P1W9	Pim2	CAMK	PIM	0.467160777644582	0.992536522466523	1.4596973001111	1.51461933028906	0.354616635573615	0.360282084087601	0.032094516500878
Q16644	MAPKAPK3	CAMK	MAPKAPK	0.534332916944744	0.895524381553991	1.42985729849873	1.48465610691162	0.35075567412821	0.376849979950123	0.059326340726814
P11309	Pim1	CAMK	PIM	0.598450657955042	0.930630256990787	1.52908091494583	1.46918580649538	0.357637961025274	0.356097508005202	0.00583461811465692
P10398	ARAF	TKL	RAF	0.341633580874914	1.06299661101965	1.40463019189457	1.396292817326	0.374050858811375	0.374050858811375	0
P15056	BRAF	TKL	RAF	0.341633580874914	1.06299661101965	1.40463019189457	1.396292817326	0.374050858811375	0.374050858811375	0
P31751	Akt2/PKB[beta]	AGC	AKT	0.565321253646594	0.885294573611345	1.45061582725794	1.38569348868697	0.37937330147244	0.381138306210377	0.0295169539128455
Q13153	PAK1	STE	STE20	0.47462162785279	0.899657121671518	1.37427874952431	1.37957243028419	0.419861357261118	0.419861357261118	0
O96017	CHK2	CAMK	RAD53	0.501671354173581	0.746016023346018	1.2476873775196	1.33958991646138	0.378097882440243	0.387728313342376	0.0363269245080378
Q14164	IKK[epsilon]	Other	IKK	0.538972936303486	0.983044219719637	1.52201715602312	1.29633039143893	0.447880045530577	0.416246398324682	0.0924030050060632
P49137	MAPKAPK2	CAMK	MAPKAPK	0.419090246534083	0.819374058149721	1.2384643046838	1.19219446772938	0.346857835965809	0.345245869403625	0.0370396826338863
P42345	mTOR/FRAP	Atypical	PIKK	0.473065304915421	0.695652668184646	1.16871797310007	1.18585899267993	0.413971220346193	0.415543373726651	0.0469858474644852
Q15349	RSK1/p90RSK	AGC	RSK	0.379502458153549	0.804498167182383	1.18400062533593	1.16938567213303	0.375318756260051	0.375318756260051	0
O75116	ROCK2	AGC	DMPK	0.322998536752854	0.8467274437723	1.16972598052515	1.1619068615544	0.344948697750525	0.384923545309663	0.0750150888349615
Q96GD4	AurB/Aur1	Other	AUR	0.272660769696526	0.716307624438949	0.988968394135475	1.16135236791504	0.294650971708179	0.34964331343397	0.109122045164641
Q02156	PKC[epsilon]	AGC	PKC	0.168392508892206	0.801498039363655	0.969890548255861	0.972405788173774	0.279294127643031	0.281359732483974	0.0292906536636812
Q05655	PKC[delta]	AGC	PKC	0.191987513199363	0.720037260230798	0.912024773430161	0.87424555629037	0.291868990626465	0.275356342262962	0.0342885597263423
P16066	ANP[alpha]	RGC	RGC	0.188628259622103	0.632621402367194	0.821249661989297	0.847589336370422	0.291200891514547	0.296414989602697	0.0191142291386669
Q15418	RSK3	AGC	RSK	0.195009200392957	0.638540406879727	0.833549607272685	0.836767043919849	0.272530637218507	0.272530637218507	0
P23443	p70S6K	AGC	RSK	0.278894527097342	0.720506910758026	0.999401437855368	0.826976987040247	0.297820727405669	0.266054857785605	0.0637592937619038
P05129	PKC[gamma]	AGC	PKC	0.127779527019526	0.616797879369512	0.744577406389039	0.811555271977686	0.240668126497385	0.244503316483623	0.0517695175191877
P04049	RAF1	TKL	RAF	0.203513063169102	0.583050170934913	0.786563234104016	0.772524656517629	0.265765667129195	0.261325043529729	0.0133218707983979
Q9UIK4	DAPK2	CAMK	DAPK	0.138988898104704	0.500270379807874	0.639259277912578	0.772299630515346	0.190965579319956	0.228419876196063	0.0693518817414955
Q00537	PCTAIRE2	CMGC	CDK	0.18575240426808	0.492144128304169	0.677896532572249	0.677896532572249	0.199382748677981	0.199382748677981	NA
Q04759	PKC[theta]	AGC	PKC	0.0597811330579818	0.615412400164255	0.675193533222237	0.671669333907858	0.214937195150549	0.224148185919022	0.0191429182744654
P41743	PKC[iota]	AGC	PKC	0.107113301359539	0.589430891146572	0.696544192506111	0.65909605416071	0.2308320211378	0.22214634979065	0.0284298551974489
P24723	PKC[eta]	AGC	PKC	0.0455352109861295	0.482118924466507	0.527654135452637	0.653240309511659	0.144749864481372	0.184847926628949	0.0809013557565955
O15075	DCAMKL1	CAMK	DCAMKL	0.192046695014981	0.409840130653644	0.601886825668625	0.59784917206492	0.243382697008643	0.243382697008643	0.0750662385117725
P50750	CDK9	CMGC	CDK	0.122471197091233	0.517187910119192	0.639659107210425	0.575314329897897	-0.201223005942561	-0.187395638179597	0.0207410516444464
Q00532	CDKL1	CMGC	CDKL	0.225051642307777	0.398864186194826	0.623915828502603	0.563055372828428	0.270725926645248	0.244298129361794	0.117929002213513
P49841	GSK3[beta]	CMGC	GSK	0.147740736832598	0.414583765724933	0.562324502557532	0.561362733831389	0.199987156418728	0.199987156418728	0
Q8IWB6	SgK307	Other	NKF5	0.139042834362244	0.289711561428019	0.428754395790263	0.554408249793312	0.189391037407466	0.246859319913569	0.0786916866741804
Q9Y6S9	RSKL2	AGC	RSKL	0.143060186853724	0.384396424324529	0.527456611178253	0.52319096678982	0.18558144930782	0.18558144930782	0
P50613	CDK7	CMGC	CDK	0.0605977096545048	0.40915138240631	0.469749092060814	0.521693293077433	0.160614316334789	0.179440530467211	0.050185935347099
P51812	RSK2	AGC	RSK	0.0785583126365662	0.355672691186519	0.434231003823085	0.426163339795515	0.162585294906031	0.162585294906031	0
O43293	DAPK3	CAMK	DAPK	0.1249387366083	0.220403508742175	0.345342245350475	0.345342245350475	0.183322647895275	0.183322647895275	NA
Q00535	CDK5	CMGC	CDK	0.0347620752826212	0.307258687095768	0.342020762378389	0.341423910550705	-0.100539323975259	-0.100539323975259	0
O00141	SGK1	AGC	SGK	0.092125897508186	0.243650274892189	0.335776172400375	0.336751504009966	0.133963711017909	0.133963711017909	0
Q00534	CDK6	CMGC	CDK	0.0660079009597593	0.229529249299403	0.295537150259163	0.324573634422096	0.117850515193856	0.128410954200946	0.0316813170212696
Q9BWU1	CDK11	CMGC	CDK	0.0913217232697067	0.206655024475313	0.297976747745019	0.294855006830423	-0.135472132517644	-0.135472132517644	0
Q00526	CDK3	CMGC	CDK	0.0480023814575562	0.175999644685851	0.224002026143408	0.283622656050112	0.100854889654577	0.141622013924666	0.0644748422237559
O15264	p38[delta]	CMGC	MAPK	0.0164762052237151	0.23305803940491	0.249534244628626	0.266834846578306	0.0896043379953839	0.100877283802659	0.0270997817617447
Q16539	MAPK14	CMGC	MAPK	0.0352537102350216	0.199777182475056	0.235030892710078	0.265424173759399	0.0966251352398472	0.113359099228195	0.0539433343906627
Q15759	p38[beta]	CMGC	MAPK	0.0523637704620538	0.183558832654363	0.235922603116417	0.252465408791339	-0.0824160479414951	-0.10262276087042	0.0615513658149419
O14965	AurA/Aur2	Other	AUR	0.0584597694733483	0.173454234169451	0.231914003642799	0.231409252009921	-0.0977727891887808	-0.0977727891887808	0
Q05513	PKC[zeta]	AGC	PKC	0.016087949709753	0.175782052981981	0.191870002691734	0.216096420727265	0.0685136119481428	0.0811749451210915	0.0251240541316161
P45984	JNK2	CMGC	MAPK	0.00900104108942164	0.196591655393101	0.205592696482523	0.199063081428485	0.0713147129447596	0.0755121991797822	0.0298445080385237
Q96S38	RSKL1	AGC	RSKL	0.0566647962117712	0.136730162255127	0.193394958466898	0.193105182281297	0.0823762880664842	0.0823762880664842	0
P51955	Nek2	Other	NEK	0.0698028836796896	0.116204459162592	0.186007342842281	0.187605433893699	-0.0979385242133663	-0.0979385242133663	0
O76039	CDKL5	CMGC	CDKL	0.0530794463463855	0.136681070019294	0.18976051636568	0.181943104897564	0.0898972152272196	0.0825195145866993	0.0661057026034316
Q92772	CDKL2	CMGC	CDKL	0.0574958938319193	0.109020403010311	0.16651629684223	0.16651629684223	-0.0935847054323214	-0.0935847054323214	NA
P53779	JNK3	CMGC	MAPK	0.00803368249955116	0.188304510037006	0.196338192536557	0.151008334208965	0.0865493030343888	0.0750456863463669	0.025541633434656
P45983	JNK1	CMGC	MAPK	0.00329926649691142	0.158241006449799	0.16154027294671	0.15013362196583	0.0779632157905405	0.0750456863463669	0.00672680134640228
Q8NI60	ADCK3	Atypical	ABC1	0.0291907088329346	0.150964694600736	0.180155403433671	0.142923330097726	0.0825660249224641	0.0739378861455116	0.0282419630639591
P05771	PKC[beta]	AGC	PKC	0.0124431748784883	0.114703014879988	0.127146189758476	0.126567786636709	0.0608831988360521	0.0608831988360521	0
O75582	MSK1	AGC	RSK	0.0221007734929788	0.104036290461969	0.126137063954948	0.121202549470876	0.0533779543484052	0.0533779543484052	0
Q16512	PKN1/PRK1	AGC	PKN	0.0303277654831032	0.124762476672352	0.155090242155455	0.111966606417255	0.0573864963362501	0.0434227838660596	0.0292582001736682
P27361	ERK1	CMGC	MAPK	0.00654974267415214	0.104831749750521	0.111381492424673	0.106302582631693	-0.0113448826856541	-0.0319239231923713	0.062546981069796
P06493	CDC2/CDK1	CMGC	CDK	0.00669371886422994	0.0804826627363418	0.0871763816005717	0.100816638232183	0.0119163480473875	0.0206207703612737	0.0419870809788206
P53778	p38[gamma]	CMGC	MAPK	0.0226767073862531	0.0497136274755224	0.0723903348617755	0.100328299005181	0.0062397590885536	0.000693559080804764	0.0494309221987866
P28482	ERK2	CMGC	MAPK	0.0178450904714878	0.110285847227721	0.128130937699209	0.0972641073238491	-0.0126077708232343	-0.017952456061567	0.0729015123346804
O14757	CHK1	CAMK	CAMKL	0.025982573653715	0.175421843531496	0.201404417185211	0.0868815752779346	0.0233793020883141	0.0249646639767919	0.086686224881583
Q13464	ROCK1	AGC	DMPK	0.0684485527293774	0.326693033916866	0.395141586646243	0.0581647064540801	0.0656723619369313	-0.0267047329421365	0.126492546655151
Q13164	ERK5	CMGC	MAPK	0.0138301105965526	0.0490159381036466	0.0628460487001992	0.0569964450147933	0.00947051487372923	0.00216407293183619	0.0537842174391541
O60285	NuaK1	CAMK	CAMKL	0.0172927826057493	0.0367022482110718	0.053995030816821	0.0533730982193146	0.0235101245900331	0.0235101245900331	0
P11802	CDK4	CMGC	CDK	0.0181999765583867	0.0672899682477979	0.0854899448061846	0.0497325319864115	0.0382041177388723	0.0230343654297577	0.045509256927344
P24941	CDK2	CMGC	CDK	0.00887630882522688	0.0821038946047401	0.090980203429967	0.0409586076789064	-0.0415156253211703	-0.0188206303903065	0.0445422857680647

## Sheet: Supplementary Table 3
UKA_STK_03_60min vs 10min CXCR4KO
Kinase Uniprot ID	Kinase Name	Kinase Group	Kinase Family	Mean Specificity Score	Mean Significance Score	Mean Final Score	Median Final score	Mean Kinase Statistic	Median Kinase Statistic	SD Kinase Statitistic
Q15759	p38[beta]	CMGC	MAPK	2.47319750758803	2.03566687589218	4.50886438348022	4.54845500650403	-1.37507727739437	-1.31199938398875	0.244593966263407
O15264	p38[delta]	CMGC	MAPK	1.32639090099649	1.80031725561177	3.12670815660826	3.17263072694618	-0.752697972949311	-0.722112666842434	0.10197953256967
Q05655	PKC[delta]	AGC	PKC	1.26580454442424	1.49289556617135	2.75870011059559	3.09691001300806	-0.670119432704386	-0.703814543780849	0.0510395553920216
P16066	ANP[alpha]	RGC	RGC	1.2320088465152	1.83492089517441	3.06692974168961	3.02136305161553	-0.694329576094958	-0.678045371148299	0.0291523721972371
Q05513	PKC[zeta]	AGC	PKC	1.2143280551286	1.83492089517441	3.04924895030301	3.02136305161553	-0.7698505111033	-0.772835990189388	0.00592412640462984
P41743	PKC[iota]	AGC	PKC	1.25816530244102	1.73253756228074	2.99070286472176	3.01412464269161	-0.728935732084485	-0.750961573351502	0.0403393341301738
P11309	Pim1	CAMK	PIM	1.70211527417537	1.23166523935676	2.93378051353214	2.97633608180221	-0.604558399648995	-0.605271316117707	0.00672494050233787
Q16539	MAPK14	CMGC	MAPK	0.978037293875814	1.71104818530614	2.68908547918196	2.95078197732982	-0.72455837982953	-0.739494077789508	0.089662678966616
Q9UIK4	DAPK2	CAMK	DAPK	0.786194040183983	1.98242078435815	2.76861482454213	2.84315073521984	-0.76583154199962	-0.789923047382906	0.044608799835249
P23443	p70S6K	AGC	RSK	1.27698284426287	1.56068018272255	2.83766302698543	2.77469071827414	-0.713651180903265	-0.718516570539602	0.047269857486519
P05771	PKC[beta]	AGC	PKC	0.763658960651862	1.83492089517441	2.59857985582627	2.61332271603916	-0.662860745410247	-0.662860745410247	0
Q96GD4	AurB/Aur1	Other	AUR	1.14989929319946	1.54852703052427	2.69842632372373	2.54975089168064	-0.931628777237211	-0.876651456656	0.109092238504918
Q14164	IKK[epsilon]	Other	IKK	1.02460422053963	1.34338525371983	2.36798947425946	2.42250820016277	-0.815702499192923	-0.792443808018363	0.0488376131172234
Q9HBY8	SGK2	AGC	SGK	1.26392488399183	1.33156209642395	2.59548698041579	2.37427609047424	-0.742175715769605	-0.752407729193071	0.0731884235670476
Q00534	CDK6	CMGC	CDK	0.559229821438647	1.7587143171842	2.31794413862284	2.32458830628514	-0.643498656091663	-0.632691278558122	0.0324221326006224
P48729	CK1[alpha]	CK1	CK1	0.839615150109084	1.45988594504383	2.29950109515292	2.31623273857469	-0.703546775377817	-0.677458695238178	0.0557008728368505
P45984	JNK2	CMGC	MAPK	0.949270641611421	1.43413196713845	2.38340260874987	2.31158017799729	-0.683996226048416	-0.680103891906038	0.0374081584811836
Q00535	CDK5	CMGC	CDK	0.756350285301594	1.49473313738576	2.25108342268735	2.23837281543842	-0.68457774261692	-0.68457774261692	0
Q9P1W9	Pim2	CAMK	PIM	1.17017266339271	1.25229152568587	2.42246418907857	2.23657200643706	-0.624859099752775	-0.622770841249363	0.0291637435149966
Q02156	PKC[epsilon]	AGC	PKC	0.815794950168069	1.4514607332763	2.26725568344437	2.21838821750685	-0.63229383818804	-0.630301778186154	0.0200867763999227
P05129	PKC[gamma]	AGC	PKC	0.846288121792601	1.55309784084915	2.39938596264175	2.20704829174987	-0.654294992388171	-0.640404339253735	0.0611922939644153
O75582	MSK1	AGC	RSK	0.731013789351939	1.4196633179961	2.15067710734804	2.16749108729376	-0.698115175713734	-0.698115175713734	0
Q04759	PKC[theta]	AGC	PKC	0.761120361864203	1.50820011612426	2.26932047798847	2.15144142787624	-0.621194108165331	-0.606424782422474	0.0261853159012534
Q8IWB6	SgK307	Other	NKF5	0.684276842921162	1.30688821735107	1.99116506027223	2.138585081364	-0.712623545328961	-0.755729141405828	0.0590247683150163
Q9BWU1	CDK11	CMGC	CDK	0.875630767872869	1.24031935794374	2.11595012581661	2.08576265223226	-0.817979714133346	-0.817979714133346	0
Q86V86	Pim3	CAMK	PIM	0.910359114929876	1.23166523935676	2.14202435428664	2.05394093961488	-0.577713503118852	-0.577656945020372	0.0127655773321887
O14965	AurA/Aur2	Other	AUR	0.591291462748376	1.44676913454684	2.03806059729522	2.01772876696043	-0.665838045892072	-0.665838045892072	0
Q9Y6S9	RSKL2	AGC	RSKL	0.715476789419544	1.20564119902655	1.9211179884461	1.92795287137784	-0.755580409649203	-0.755580409649203	0
P31749	Akt1/PKB[alpha]	AGC	AKT	0.753590360650074	1.23166523935676	1.98525560000684	1.92081875395238	-0.60484674695381	-0.604986318093978	0.0186132289208593
P11802	CDK4	CMGC	CDK	0.652417293261041	1.31923645595335	1.9716537492144	1.90225694105512	-0.676616323111797	-0.678843767308482	0.00668233259005424
P50750	CDK9	CMGC	CDK	0.643571079128074	1.30598329384947	1.94955437297754	1.89387712599335	-0.666427406127417	-0.644421073747097	0.0330094985704806
Q8NI60	ADCK3	Atypical	ABC1	0.456936874700377	1.3966052252709	1.85354209997127	1.87614835903291	-0.58325504194986	-0.587840476724933	0.0168183134887699
Q15349	RSK1/p90RSK	AGC	RSK	0.668470328041428	1.23468154184457	1.903151869886	1.87484417041947	-0.690495002887696	-0.690495002887696	0
P51812	RSK2	AGC	RSK	0.599725316464488	1.23303051124945	1.83275582771394	1.86569536504546	-0.638337657111919	-0.638337657111919	0
P27361	ERK1	CMGC	MAPK	0.604508846350726	1.48277427006464	2.08728311641537	1.85263289220621	-0.624717799077707	-0.614822595695603	0.0778888597091261
O43930	PRKY	AGC	PKA	0.661500260862737	1.22422670717559	1.88572696803832	1.83303733614283	-0.658895200739525	-0.675890946027746	0.064959126735135
P31751	Akt2/PKB[beta]	AGC	AKT	0.623261108996344	1.23166523935676	1.85492634835311	1.82044820883481	-0.586156375555297	-0.578727241343966	0.0305673877077472
P53778	p38[gamma]	CMGC	MAPK	0.593537186856074	1.06076072611287	1.65429791296895	1.80955624029331	-0.586204326196347	-0.621878824093982	0.171551846044478
Q15418	RSK3	AGC	RSK	0.493127709110083	1.28184502723386	1.77497273634394	1.7851561519523	-0.593491744597291	-0.593491744597291	0
Q13131	AMPK[alpha]1	CAMK	CAMKL	0.59029279872523	1.1370505492845	1.72734334800973	1.74743821379367	-0.618294203333209	-0.629787622576748	0.0248394439834882
Q13153	PAK1	STE	STE20	0.463346770583357	1.3168526463386	1.78019941692196	1.74357091769675	-0.598034070589831	-0.598034070589831	0
P53779	JNK3	CMGC	MAPK	0.68206140660964	1.24540410534248	1.92746551195211	1.7389751660076	-0.612690688736755	-0.593639324660136	0.03323424290505
P24723	PKC[eta]	AGC	PKC	0.506555881946773	1.44811927948414	1.95467516143092	1.73859437292586	-0.594586019833489	-0.587143817913733	0.0583674778123827
O96017	CHK2	CAMK	RAD53	0.593581402868596	1.19487395257183	1.78845535544043	1.73518217699046	-0.597834885700075	-0.602438555838652	0.0344088772221329
P45983	JNK1	CMGC	MAPK	0.623127307597893	1.17118800137241	1.7943153089703	1.73292218325956	-0.602356322288908	-0.593639324660136	0.0186014297881377
Q13464	ROCK1	AGC	DMPK	0.588302728512765	1.00674091929214	1.59504364780491	1.70774392864352	-0.685059865307065	-0.747209288940167	0.0851016031494872
O95819	HGK/ZC1	STE	STE20	0.651556540349252	1.01825305921979	1.66980959956905	1.69285694539456	-0.682373095472904	-0.70363211534723	0.0378639137370995
Q16512	PKN1/PRK1	AGC	PKN	0.563337086401385	1.08758667937275	1.65092376577413	1.68934916352169	-0.63735230014586	-0.644926871994644	0.0223368123707715
P50613	CDK7	CMGC	CDK	0.43740155130902	1.24087218145897	1.67827373276799	1.65663079977247	-0.571196754042495	-0.585183048201474	0.0198671283316489
O14757	CHK1	CAMK	CAMKL	0.547382949150155	1.13289083796858	1.68027378711873	1.65161724358208	-0.615199646676127	-0.59439791483726	0.0313705566349993
Q96S38	RSKL1	AGC	RSKL	0.565569936301498	1.05174651349473	1.61731644979623	1.64820644317727	-0.657527048751793	-0.657527048751793	0
P06493	CDC2/CDK1	CMGC	CDK	0.492139725321794	1.06677265296161	1.5589123782834	1.59846160983406	-0.584952221616361	-0.586681878587314	0.0159858346153518
P49137	MAPKAPK2	CAMK	MAPKAPK	0.319195745332061	1.28821445794977	1.60741020328183	1.57642648026726	-0.537338193438885	-0.528896442898149	0.0357086857350477
Q13237	PKG2	AGC	PKG	0.347623085008172	1.09032823772344	1.43795132273162	1.48704892002751	-0.539407447767607	-0.546112279067734	0.0245799291002032
Q16644	MAPKAPK3	CAMK	MAPKAPK	0.218456523386747	1.18475682343953	1.40321334682627	1.4317513277159	-0.509411492659231	-0.506354156630998	0.0288173765960875
P04049	RAF1	TKL	RAF	0.366852911695828	1.08541237224592	1.45226528394175	1.43001780194152	-0.544208639154	-0.537775996800681	0.0192979270599567
P17252	PKC[alpha]	AGC	PKC	0.223224302595833	1.18967309968036	1.41289740227619	1.42763963326986	-0.511944982607183	-0.51142113111826	0.00771154427182994
Q00526	CDK3	CMGC	CDK	0.387577338291121	1.06651119990935	1.45408853820047	1.4199421987133	-0.559516683651692	-0.558481261166371	0.0394721322584262
P28482	ERK2	CMGC	MAPK	0.439813409939393	1.24862511909574	1.68843852903514	1.41770931728101	-0.577109440273468	-0.567449716420295	0.119501271193222
Q9UBS0	p70S6K[beta]	AGC	RSK	0.336721074653958	1.09146855799283	1.42818963264679	1.39902710431325	-0.545681675831717	-0.535494363266316	0.0580592131700953
P42345	mTOR/FRAP	Atypical	PIKK	0.386819629263663	0.935708428127461	1.32252805739112	1.37509939779551	-0.553675670818473	-0.537312827256506	0.0650905985397205
Q13535	ATR	Atypical	PIKK	0.280941079381534	1.07661498144529	1.35755606082682	1.33796029172788	-0.510232983120584	-0.511072860938094	0.0025196334525307
P17612	PKA[alpha]	AGC	PKA	0.122062330595019	1.10159404253147	1.22365637312649	1.26644966297709	-0.494111867370545	-0.500045380412235	0.0203791271205541
P49841	GSK3[beta]	CMGC	GSK	0.150768968530922	1.12961477968213	1.28038374821305	1.25542540367266	-0.393871792027839	-0.393871792027839	0
P51817	PRKX	AGC	PKA	0.241264755144588	1.06172165593958	1.30298641108417	1.2530545903849	-0.514692704252335	-0.491469261578963	0.0688661219431478
P10398	ARAF	TKL	RAF	0.348166146687873	0.885437975596682	1.23360412228456	1.24952246198066	-0.518002466597421	-0.518002466597421	0
P15056	BRAF	TKL	RAF	0.348166146687873	0.885437975596682	1.23360412228456	1.24952246198066	-0.518002466597421	-0.518002466597421	0
Q16566	CaMK4	CAMK	CAMK1	0.272567962270466	1.00093841864349	1.27350638091395	1.22917743304968	-0.506645739663988	-0.503317935324421	0.0445980267754726
Q15131	CDK10	CMGC	CDK	0.258354468475171	0.881355467304836	1.13970993578001	1.15255073750083	-0.482782682064885	-0.494889367856763	0.0456320983131401
Q13976	PKG1	AGC	PKG	0.197749032748106	0.927989676914184	1.12573870966229	1.12547179818408	-0.503777102729568	-0.507273809992758	0.0271585490365457
O15075	DCAMKL1	CAMK	DCAMKL	0.327155308837134	0.784224222245288	1.11137953108242	1.11331415868104	-0.501403965726989	-0.501403965726989	0.0983164074427053
P24941	CDK2	CMGC	CDK	0.290254544018515	0.835765303566035	1.12601984758455	1.07908397497763	-0.519328125413824	-0.503890921056052	0.0324100848090155
O75116	ROCK2	AGC	DMPK	0.260496106320772	0.661887193344568	0.922383299665339	0.936952010329538	-0.474224709062998	-0.47979673542696	0.0606479406934377
Q00537	PCTAIRE2	CMGC	CDK	0.210419287835575	0.71669877129645	0.927118059132025	0.927118059132025	-0.44676939708993	-0.44676939708993	NA
O43293	DAPK3	CAMK	DAPK	0.302770657240282	0.565431095965801	0.868201753206084	0.868201753206084	-0.489959838817179	-0.489959838817179	NA
Q92772	CDKL2	CMGC	CDKL	0.25649023527157	0.565431095965801	0.821921331237371	0.821921331237371	-0.443348895523738	-0.443348895523738	NA
Q96Q40	PFTAIRE2	CMGC	CDK	0.225551356262369	0.531217659651624	0.756769015913993	0.792527210518986	-0.452341758376003	-0.458811547901811	0.0209856479564762
Q15139	PKD1	CAMK	PKD	0.132011020088717	0.538744072865927	0.670755092954644	0.665385428820606	-0.377609699240944	-0.377609699240944	0
Q00532	CDKL1	CMGC	CDKL	0.0469668761160431	0.585527458153281	0.632494334269324	0.594141600682363	-0.266073195785222	-0.248346276077403	0.0292522102913701
O14920	IKK[beta]	Other	IKK	0.159513793887515	0.498128497517754	0.657642291405269	0.583985594043088	-0.377941658580083	-0.358839847322425	0.0443643042703231
O76039	CDKL5	CMGC	CDKL	0.107882239593545	0.451848643493375	0.55973088308692	0.572215375491664	-0.363336365953457	-0.362155180513769	0.0479570360659262
O60285	NuaK1	CAMK	CAMKL	0.087555330951295	0.376921765959033	0.464477096910328	0.469849493624774	-0.287894255496205	-0.287894255496205	0
O15111	IKK[alpha]	Other	IKK	0.0930402505738456	0.364610739643802	0.457650990217648	0.448662249937129	-0.313741925644517	-0.321180463784038	0.0111578072092817
Q13164	ERK5	CMGC	MAPK	0.0347529458131388	0.436082508293527	0.470835454106666	0.420939304995943	-0.315700929366987	-0.304183588518295	0.0535063755666381
O00141	SGK1	AGC	SGK	0.0542619352036551	0.30770674899561	0.361968684199265	0.364146456110239	-0.229982154826048	-0.229982154826048	0
Q6ZWH5	Nek10	Other	NEK	0.0596217777448948	0.248942186322687	0.308563964067582	0.308563964067582	-0.239149018508697	-0.239149018508697	0
P51955	Nek2	Other	NEK	0.0111613088215107	0.135069143218756	0.146230452040267	0.151123947642759	-0.11236818647193	-0.11236818647193	0

## Sheet: Supplementary Table 4
Antibody List
target	alternativ name	species reactivity	conjugate	clone	company	catalog number
Annexin V		mouse	FITC		BD	556419
Annexin V		mouse	PE	-	Biolegend	640908
Annexin V		mouse	PE	-	BD	556422
Annexin V		mouse	APC	-	BD	550474
Annexin V		mouse	Pacific Blue		Invitrogen	A35122
beta Arrestin 1 (phospho S412)	p-Arrb1	mouse	-	polyclonal	abcam	ab4472
CD115		mouse	PE		eBioscience	12-1152-82
CD115		mouse	Alexa 647	AFS98	Biolegend	135529
CD115		mouse	BV421		Biolegend	135513
CD117	c-kit	mouse	PE-Cy7	2B8	Biolegend	105813
CD11b		mouse	Pacific Blue	M1/70	Biolegend	101223
CD150	SLAM	mouse	BV421	TC15-12F12.2	Biolegend	115925
CD150	SLAM	mouse	FITC	9D1	eBioscience	11-1501-80
CD150	SLAM	mouse	FITC		eBioscience	11-1502-80
CD150	SLAM	mouse	PerCP-Cy5.5	TC15-12F12.2	Biolegend	115921
CD150	SLAM	mouse	BV605	TC15-12F12.2	Biolegend	115927
CD150	SLAM	mouse	Alexa 647	Q38-480	BD	562647
CD150	SLAM	mouse	Alexa 647	TC15-12F12.2	Biolegend	115918
CD150	SLAM	mouse	Biotin		eBioscience	13-1501-80
CD184	CXCR4	mouse	eFluor 450		eBioscience	48-9991-82
CD184	CXCR4	mouse	Alexa 488		Invitrogen	53-9991-80
CD184	CXCR4	mouse	PE	L276F12	Biolegend	146505
CD184	CXCR4	mouse	Alexa647		Invitrogen	A20186A
CD19		mouse	Pacific Blue	6D5	Biolegend	115523
CD3		mouse	Pacific Blue	17A2	Biolegend	100214
CD34		mouse	Alexa 700		eBioscience	56-0341-82
CD45		mouse	PerCP-Cy5.5	30-F11	Biolegend	103131
CD45R	B220	mouse	Alexa647	RA3-6B2	Biolegend	103226
CD48		mouse	BV510	HM48-1	BD	563536
CD71		mouse	FITC	RI7217	Biolegend	113805
CD71		mouse	PE	RI7217	Biolegend	113808
CXCL12	SDF-1	mouse	-		Abcam	ab25117
Lamin A + Lamin C		human (maby mouse)	Alexa 555	EP4520-16	abcam	ab215495
Ly-6G/Ly-6C	Gr-1	mouse	Pacific Blue	RB6-8C5	Biolegend	108430
nuclear pore complex		mouse/human/rat	Alexa 647	mab414	Biolegend	682204
Pericentrin		human mouse	AF488	EPR21987	abcam	ab270118
pS346/pS347-CXCR4 (phospho-CXC Chemokine Receptor 4 Antibody)		Human, Mouse			7TM Antibodies	7TM0071B
Ter119		mouse	FITC	TER-119	Biolegend	116206
Ter119		mouse	BV421	TER-119	Biolegend	116234
Ter119		mouse	Alexa 488	TER-119	Biolegend	116215
Ter119		mouse	SuperBright 645	TER-119	Invitrogen	64-5921-82
Ter119		mouse	Alexa 647		Biolegend	116218
Ter119		mouse	eFluor 450		eBioscience	48-5921-82
Ter119		mouse	PE-Cy7	TER-119	Biolegend	116222
GNAI2		Mouse, Rat, Human		EPR9468	abcam	ab137050
