# Supplementary material for: Intracellular and nuclear CXCR4 signaling promotes erythroblast enucleation
Source: Research Square preprint supplement (doi:10.21203/rs.3.rs-2869635/v1), 2023-05-23
Supplement: Supplementary file 3 [file e4d036e1bb464a7bafe7c013.pdf]

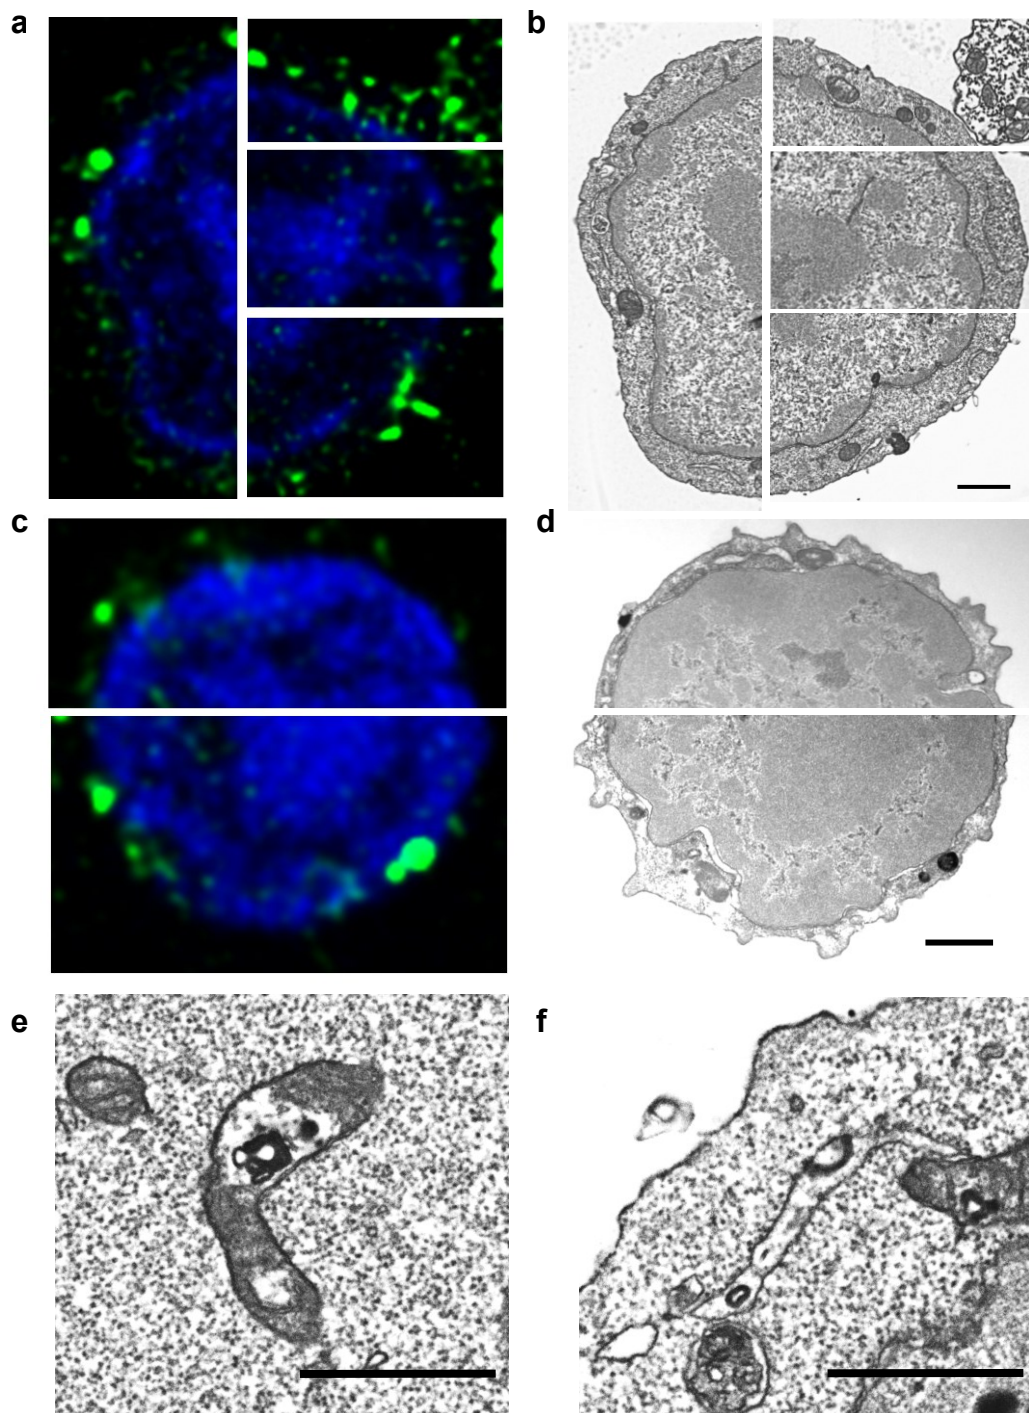

**Supplementary Figure 1. Side-by-side image separation of correlative fluorescence and electron microscopy and immune-electron microscopy with subcellular localization of CXCR4 in erythroblasts.** **a,b** correspond to the Figure 2f. **a**, Confocal immunofluorescence microscopy shows anti-CXCR4-AF488 (green) immunoreactivity and Hoechst DNA staining (blue) in an erythroblast with four segments of the same cell at different z-depth. The fluorescent signal was detected in 0.3  $\mu\text{m}$  optical confocal microscopy sections. **b**, Electron microscopy images of the same erythroblast as in (**a**) at corresponding z-depth. Scale bar, 1  $\mu\text{m}$ . **c,d** correspond to the Extended Data Figure 3a. **c**, Confocal immunofluorescence microscopy image anti-CXCR4-AF488 (green) immunoreactivity and Hoechst DNA staining (blue) in an erythroblast showing two segments of the same cell at different z-depth. The fluorescent signal was detected in 0.3  $\mu\text{m}$  optical confocal microscopy sections. **d**, Electron microscopy of the same erythroblast as in (**c**), with rat anti-CXCR4-AF488 and a horseradish peroxidase (HRP)-labeled goat-anti-rat Ig antibody. The HRP was visualized by its substrate 3,3-diaminobenzidine (DAB) that was biocatalyzed to form an electron-dense precipitate detected in ultrathin sections by transmission electron microscopy. Scale bar, 1  $\mu\text{m}$ . **e,f**, CXCR4-associated signal in erythroblasts detected in transmission electron microscopy as an electron-dense DAB precipitate in **e**, mitochondria, in **f**, endoplasmic reticulum. Scale bars, 1  $\mu\text{m}$ .
